# Supplementary material
Source: Springer Nature journal article supplement (https://www.springermedizin.de/resource/supplementary/12885_2012_3530_MOESM1_ESM.pdf/9463586)
Supplement: MOESM1 [file 9463586]

Eligible participants  
*N*=1707

Refused: 184 (10.1%)  
Excused: 182 (10.0%)  
Missed: 145 (8.0%)

Provided baseline data  
*N*=1196 (70.1% of  
eligible)

Of 1196:  
Unable to contact: 144 (12.0%)  
Refused: 80 (6.7%)  
Deceased: 56 (4.7%)  
Excused: 45 (3.8%)  
Missed: 26 (2.2%)

3 month follow-up  
*N*=845 (70.7% of 1196)

Of 1196:  
Unable to contact: 125 (10.5%)  
Refused: 101 (8.4%)  
Deceased: 93 (7.8%)  
Missed: 39 (3.3%)  
Excused: 45 (3.8%)

6 month follow-up  
*N*=793 (66.3% of 1196)

Of 1196:  
Unable to contact: 136 (11.3%)  
Refused: 99 (8.3%)  
Deceased: 183 (15.3%)  
Excused: 46 (3.8%)  
Missed: 56 (4.7%)

12 month follow-up  
*N*=676 (56.5% of 1196)
